# Supplementary material
Source: PubMed Central journal article supplement (PMC2117227)

**A**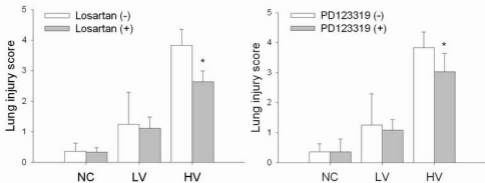**B**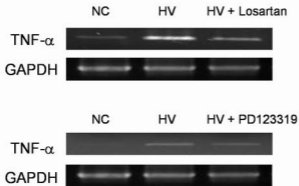

Supplement: thorax_thx.2006.061945_2.pdf [file thorax_thx.2006.061945_2.pdf]
